# Supplementary figures and images for: The Impact of Constrictotermes cyphergaster (Termitidae: Nasutitermitinae) Termites on Semiarid Ecosystems in Brazil: A Review of Current Research
Source: MDPI journal article supplement (doi:10.3390/insects13080704), 2022-08-05

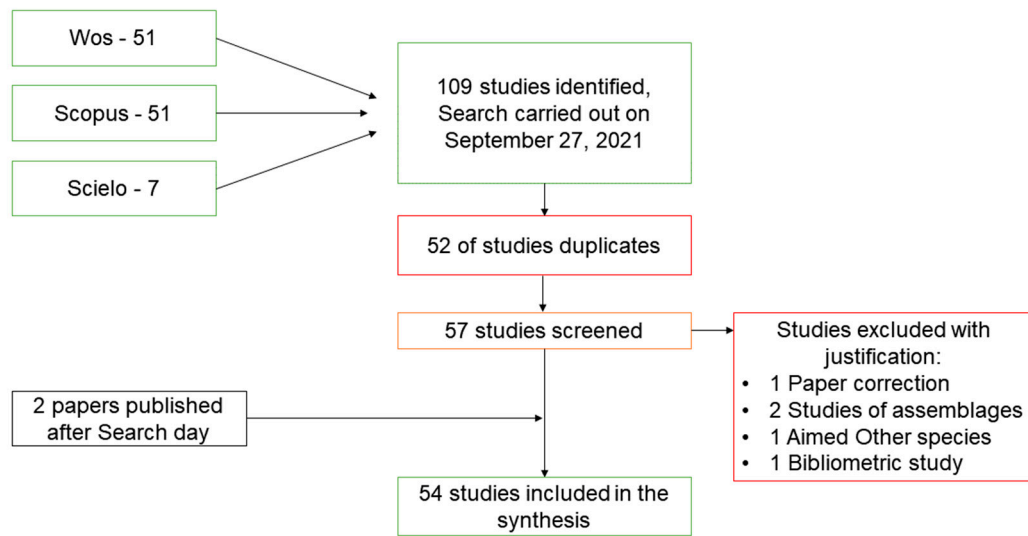

Figure S1: Prism protocol that shows the process to search and choose studies for the synthesis.

Supplement: s1 [file s1]
